# Supplementary material
Source: publisher site journal article supplement (https://www.spandidos-publications.com/1750/downloadSupplementary)

Figure S1. miR-212-3p expression is downregulated in PTX resistant HCCLM3 cells. (A) The cell viability of HCCLM3 was measured after treatment of different concentrations of PTX for 24 h by MTT. (B) The expression of miR-212-3p was measured in HCCLM3 cells after treatment of different concentrations of PTX by RT-qPCR. (C) The cell viability was detected in HCCLM3 and HCCLM3/PTX cells with varying concentrations of PTX stimulation for 24 h and IC<sub>50</sub> of PTX was analyzed. (D) The level of miR-212-3p was examined in HCCLM3 and HCCLM3/PTX cells. \*P<0.05 vs. non-treated group and HCCLM3 group.

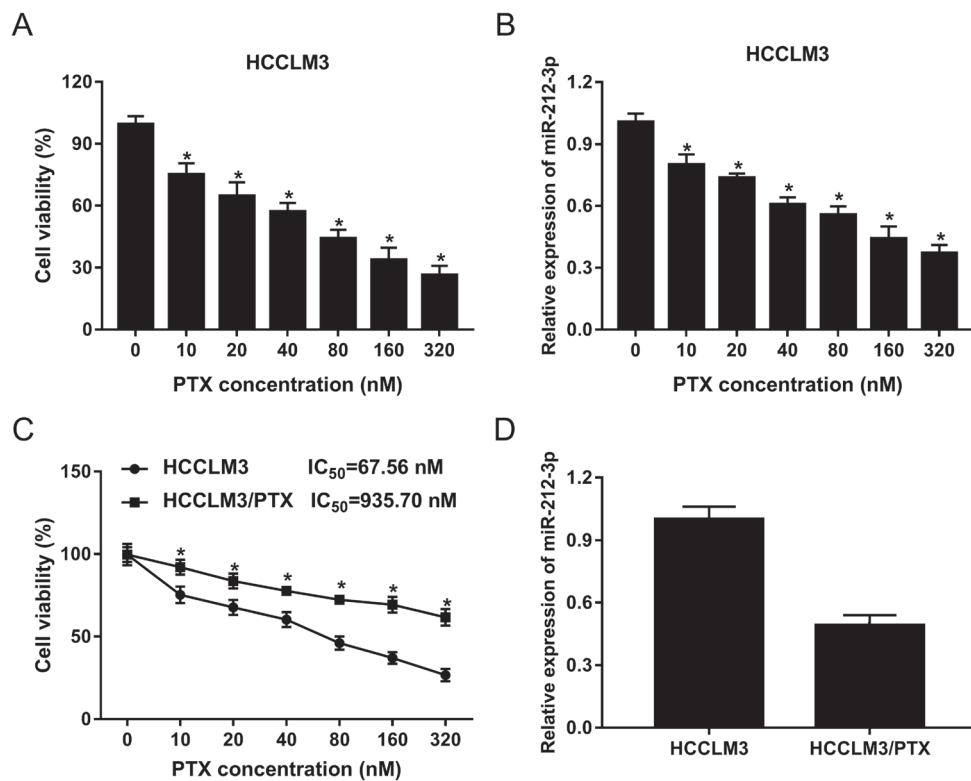

Figure S2. miR-212-3p expression in Huh7 and Huh7/PTX cells after transfection. (A) miR-212-3p level was measured in Huh7 cells transfected with miR-212-3p-inhibitor or miR-NC-inhibitor. (B) miR-212-3p abundance was detected in Huh7/PTX cells transfected with miR-212-3p or miR-NC. \* $P < 0.05$  vs. miR-NC-inhibitor group and miR-NC group.

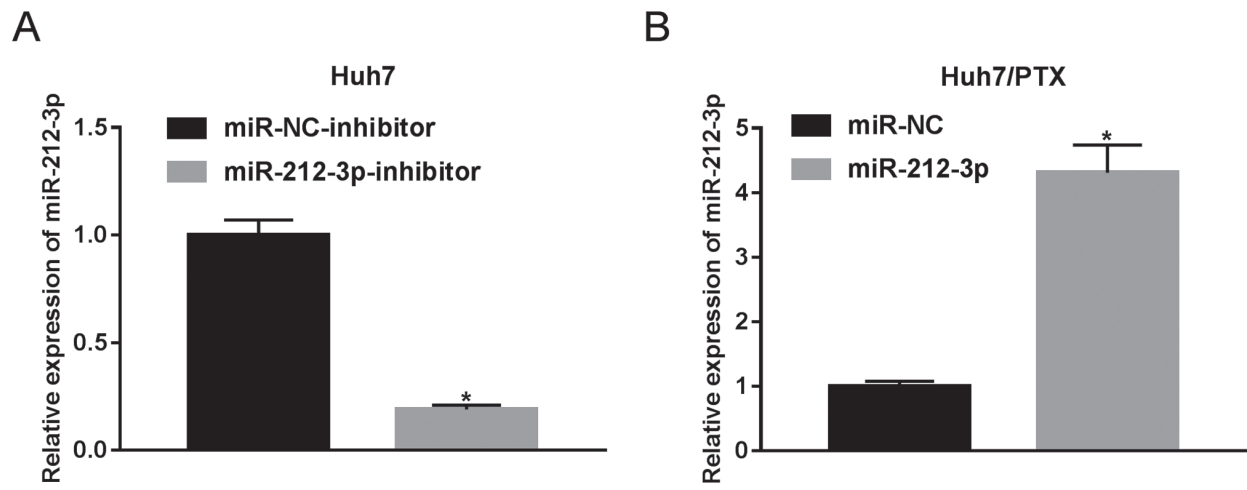

Figure S3. ZEB2 expression in Huh7 and Huh7/PTX cells after transfection. (A and B) ZEB2 mRNA level was measured in Huh7 cells transfected with Scrambled or siZEB2 and Huh7/PTX cells transfected with vector or ZEB2. (C and D) ZEB2 protein expression was detected in Huh7 cells transfected with Scrambled or siZEB2 and Huh7/PTX cells transfected with vector or ZEB2. \* $P < 0.05$  vs. scrambled group and vector group.

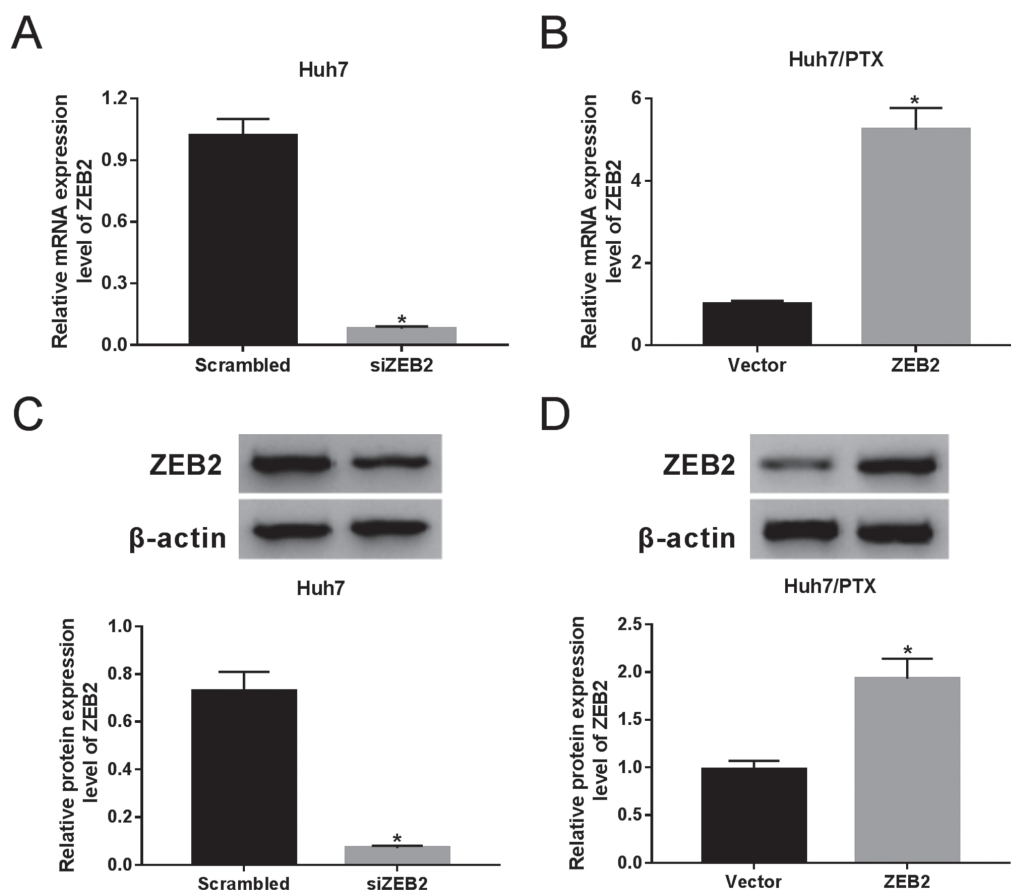

Supplement: Supplementary file 1 [file downloadSupplementary]
